# Supplementary material for: Exploring genetic associations of Crohn’s disease and ulcerative colitis with extraintestinal cancers in European and East Asian populations
Source: Frontiers journal article supplement (doi:10.3389/fimmu.2024.1339207), 2024-02-08
Supplement: Data_Sheet_1.zip [file Supplementary Tables S1-S9 .xlsx]

## Sheet: Table S1
Table S1 The SNPs removed by querying the PhenoScanner website
Crohn's disease (European)		Ulcerative colitis (European)		Crohn's disease (East Asian)		Ulcerative colitis (East Asian)
SNPs	traits	SNPs	traits	SNPs	traits	SNPs	traits
rs13407913	Body mass index	rs6062496	Current tobacco smoking	/	/	/	/
rs6062496	Current tobacco smoking
rs780094	alcohol intake frequency

## Sheet: Table S2
Table S2 Characteristics of selected SNPs for Crohn's disease in European populations
SNP	effect_allele	other_allele	pval	beta	se	eaf	samplesize	F
rs17129991	T	C	2.81365e-10	-0.284461	0.0450901	0.02246	51874	39.8
rs17391694	T	C	2.61818e-09	-0.119051	0.0199954	0.1226	51874	35.4492
rs2974935	T	G	5.79522e-10	0.0755507	0.0121937	0.4948	51874	38.3889
rs10800309	G	A	8.47813e-13	-0.0904086	0.0126389	0.6578	51874	51.1683
rs10798069	T	G	4.24717e-09	-0.070387	0.0119822	0.4925	51874	34.5074
rs6679677	A	C	4.66659e-17	-0.185152	0.0220556	0.09755	51874	70.4724
rs2641348	G	A	9.65162e-10	-0.121336	0.0198422	0.1077	51874	37.3938
rs12411259	A	G	1.42758e-22	0.134364	0.0137443	0.2401	51874	95.5698
rs3024505	A	G	3.94548e-25	0.165311	0.0159634	0.1573	51874	107.239
rs6702421	T	C	6.52529e-15	0.110194	0.0141395	0.2255	51874	60.7362
rs7517847	G	T	1.37721e-159	-0.335814	0.0124758	0.4352	51874	724.537
rs35730213	C	G	7.8361e-28	-0.151105	0.0138184	0.2807	51874	119.575
rs36016881	G	A	1.60313e-10	-0.108961	0.0170379	0.1754	51874	40.8987
rs77981966	T	C	2.1923e-16	0.182656	0.0222451	0.07271	51874	67.4216
rs13001325	T	C	1.67687e-22	-0.122687	0.0125708	0.3757	51874	95.2514
rs11691685	G	A	1.35176e-11	-0.157687	0.0233162	0.08024	51874	45.7379
rs1517352	C	A	1.31362e-10	0.0800097	0.0124517	0.6048	51874	41.2884
rs6738394	A	G	8.97635e-11	0.0777406	0.011991	0.4519	51874	42.0325
rs12694846	G	A	2.50092e-17	0.115366	0.0136242	0.2593	51874	71.7024
rs7608910	G	A	2.94917e-23	0.120609	0.0121405	0.3909	51874	98.693
rs6738490	C	T	4.25794e-78	0.226164	0.0120892	0.5274	51874	349.987
rs13407913	G	A	9.63607e-22	0.114508	0.0119519	0.4306	51874	91.7905
rs780094	C	T	4.55722e-22	-0.116483	0.0120611	0.6051	51874	93.272
rs35320439	C	T	9.89464e-10	0.0840555	0.0137546	0.3104	51874	37.3453
rs6740462	A	C	1.7362e-12	0.099737	0.0141387	0.7378	51874	49.7615
rs11713774	C	T	1.08868e-14	0.132662	0.0171654	0.1427	51874	59.729
rs3197999	A	G	2.05211e-33	0.155114	0.0128775	0.2812	51874	145.09
rs7438704	G	A	3.41979e-11	0.0839019	0.0126601	0.6435	51874	43.9207
rs34592089	A	G	1.41059e-15	0.199406	0.0249741	0.05297	51874	63.7524
rs6827756	C	T	3.27002e-10	-0.0789645	0.0125632	0.6251	51874	39.506
rs1363907	A	G	3.89135e-16	0.102575	0.0125984	0.4212	51874	66.2906
rs3776414	G	T	5.04313e-13	0.0888353	0.012297	0.3756	51874	52.1883
rs7711427	C	A	5.16535e-88	0.24803	0.0124713	0.613	51874	395.535
rs79980175	C	A	1.69551e-13	-0.134258	0.0182147	0.136	51874	54.3296
rs71624119	A	G	6.574e-10	-0.0923221	0.0149485	0.2422	51874	38.1431
rs11167518	A	C	3.21144e-45	0.279727	0.0198222	0.08143	51874	199.143
rs4703855	T	C	3.03054e-08	-0.073261	0.0132248	0.2998	51874	30.6879
rs17622378	G	A	7.17133e-56	0.190197	0.0120781	0.4186	51874	247.976
rs34804116	A	C	1.27145e-13	-0.0939086	0.0126747	0.3867	51874	54.8953
rs181826	A	C	4.53419e-15	0.0995948	0.0127047	0.6266	51874	61.4532
rs17388425	G	C	6.53582e-20	-0.157253	0.0172142	0.1598	51874	83.4496
rs56163845	G	A	9.3994e-12	-0.091908	0.0134853	0.3096	51874	46.45
rs9264942	C	T	6.77798e-32	0.150794	0.0128298	0.3529	51874	138.143
rs9494844	A	C	4.18071e-10	-0.088944	0.0142376	0.2519	51874	39.0265
rs7773324	A	G	1.06106e-09	0.078744	0.012909	0.6002	51874	37.2091
rs1847472	A	C	1.08971e-10	-0.0853854	0.0132299	0.3421	51874	41.6538
rs9457247	T	C	2.07922e-23	0.123663	0.0124045	0.5398	51874	99.385
rs6908425	C	T	4.80839e-12	0.103988	0.0150464	0.7843	51874	47.7641
rs6456426	A	C	1.3671e-16	-0.0991795	0.0119962	0.4984	51874	68.3528
rs11152949	G	A	2.17921e-25	0.133849	0.0128549	0.3195	51874	108.416
rs438475	A	G	3.41507e-20	0.159076	0.0172814	0.1322	51874	84.7328
rs1267501	C	T	9.69059e-09	0.0871787	0.0151984	0.8106	51874	32.9022
rs3129871	C	A	1.79556e-11	-0.087922	0.0130803	0.6601	51874	45.1814
rs9491892	G	T	3.80102e-17	0.137869	0.0163762	0.1496	51874	70.8773
rs212388	T	C	1.79515e-16	-0.102377	0.0124319	0.6043	51874	67.8156
rs3801810	A	G	6.63285e-14	0.105079	0.01402	0.2337	51874	56.1741
rs1456896	T	C	1.03467e-13	0.0977081	0.0131392	0.6894	51874	55.2998
rs11768997	T	G	1.83443e-27	0.226326	0.0208449	0.1346	51874	117.888
rs2395022	C	A	3.1348e-10	-0.177152	0.0281553	0.95885	51874	39.5888
rs2538470	G	A	1.04597e-09	-0.0749643	0.0122847	0.6378	51874	37.2374
rs7786444	T	C	9.83354e-10	0.112085	0.0183382	0.1163	51874	37.3578
rs7015630	C	T	8.99974e-10	-0.0842498	0.0137523	0.2657	51874	37.5307
rs6651252	C	T	3.86011e-16	-0.149029	0.0183017	0.13	51874	66.3069
rs10956252	G	C	8.34065e-22	0.118641	0.0123641	0.6189	51874	92.0756
rs7848647	C	T	1.54846e-27	0.141308	0.0129961	0.6746	51874	118.224
rs10758669	A	C	4.18504e-34	-0.14975	0.012299	0.6504	51874	148.25
rs11793497	G	A	9.80393e-44	0.168922	0.0121801	0.423	51874	192.34
rs34779708	G	T	1.89714e-27	0.134457	0.0123872	0.3512	51874	117.82
rs1250573	A	G	5.85733e-26	-0.141693	0.0134477	0.3155	51874	111.02
rs7085798	A	C	1.52651e-47	-0.174348	0.0120372	0.5176	51874	209.789
rs61839660	T	C	3.19227e-13	0.148159	0.0203346	0.08983	51874	53.0866
rs303429	T	C	8.37568e-10	0.0762756	0.0124275	0.5997	51874	37.6707
rs11185982	C	T	1.05412e-10	-0.109139	0.0168972	0.1517	51874	41.7187
rs2153283	A	C	2.39497e-12	-0.108804	0.0155227	0.217	51874	49.131
rs10995271	C	G	4.92266e-53	-0.187653	0.012242	0.6098	51874	234.967
rs2227551	T	G	4.72389e-13	0.0994456	0.0137489	0.7288	51874	52.3161
rs12796489	A	C	4.95564e-51	-0.79177	0.0526931	0.02286	51874	225.783
rs559928	C	T	3.74524e-10	0.099124	0.0158237	0.8128	51874	39.2411
rs11236797	A	C	8.53886e-51	0.180737	0.0120572	0.4444	51874	224.699
rs34787213	T	C	2.85496e-16	-0.14973	0.0183059	0.1401	51874	66.9014
rs3184504	C	T	1.71017e-08	-0.067651	0.0119969	0.5074	51874	31.7988
rs7969592	G	A	1.03612e-09	-0.0731898	0.011991	0.4746	51874	37.2555
rs10878302	A	T	4.20436e-11	0.15677	0.023765	0.92855	51874	43.5161
rs28999107	T	G	1.2933e-11	0.0856594	0.0126539	0.4387	51874	45.8249
rs76906269	G	A	1.74703e-26	0.394341	0.0370279	0.01883	51874	113.419
rs9554587	G	A	8.28896e-11	-0.0951561	0.0146501	0.2242	51874	42.1883
rs9594766	A	G	1.38526e-09	-0.0735547	0.0121434	0.5294	51874	36.6894
rs1927681	A	T	2.42493e-13	0.0887872	0.0121244	0.443	51874	53.6266
rs915286	A	G	2.5875e-08	0.066645	0.0119709	0.5488	51874	30.9943
rs6561151	A	G	4.6752e-25	0.147148	0.0142318	0.2235	51874	106.903
rs11159833	T	C	7.59277e-14	0.155227	0.0207601	0.08681	51874	55.9082
rs1569328	T	C	6.47441e-11	-0.109215	0.0167191	0.1702	51874	42.6716
rs72727394	T	C	5.28202e-12	0.103233	0.0149661	0.2007	51874	47.5795
rs17293632	T	C	3.69828e-20	0.128384	0.0139602	0.2364	51874	84.5743
rs6500315	G	A	2.17721e-23	0.145539	0.0146056	0.7753	51874	99.2933
rs1646019	T	C	8.61787e-17	-0.111379	0.013383	0.303	51874	69.2627
rs2270395	T	C	8.92689e-18	0.124328	0.0144786	0.7616	51874	73.7369
rs11117431	G	A	1.09094e-19	-0.14927	0.0164404	0.1978	51874	82.4366
rs7194886	T	C	1.4184e-77	-0.226986	0.0121749	0.4357	51874	347.59
rs26528	C	T	1.2933e-22	0.119845	0.0122466	0.4576	51874	95.7654
rs9889296	A	G	2.95665e-25	-0.143097	0.0137815	0.2723	51874	107.812
rs4795397	G	A	3.83619e-28	0.132338	0.0120311	0.4713	51874	120.993
rs12949918	C	T	3.47376e-17	-0.104177	0.0123587	0.4185	51874	71.0556
rs1292053	G	A	1.74703e-14	0.0911854	0.0118917	0.442	51874	58.798
rs3853824	C	T	1.17319e-10	0.0813612	0.0126283	0.6385	51874	41.5093
rs2847293	T	A	6.13762e-26	-0.166911	0.0158476	0.8404	51874	110.928
rs7236492	T	C	9.09452e-09	-0.0996611	0.017342	0.1537	51874	33.0258
rs35164067	A	G	3.18787e-20	-0.143373	0.015563	0.2039	51874	84.8688
rs17694108	A	G	3.29018e-09	0.0795895	0.0134523	0.2797	51874	35.0041
rs640466	C	T	1.30704e-09	-0.0758092	0.0124963	0.3739	51874	36.8028
rs2024092	A	G	7.12525e-25	0.147664	0.0143378	0.2162	51874	106.068
rs516246	T	C	1.3277e-20	0.114576	0.0123121	0.4652	51874	86.601
rs6111031	T	C	9.60727e-55	-0.282366	0.018121	0.1591	51874	242.807
rs6074022	T	C	2.6965e-12	-0.0963211	0.0137745	0.7497	51874	48.898
rs259964	G	A	2.08238e-09	-0.0713342	0.0119064	0.5414	51874	35.8951
rs6062496	A	G	3.81593e-22	0.120078	0.0124099	0.5694	51874	93.6247
rs1297258	T	C	2.10523e-25	-0.127246	0.0122169	0.4249	51874	108.484
rs2284553	G	A	5.626e-17	0.103192	0.0123247	0.5904	51874	70.1034
rs8127691	C	T	4.4761e-24	-0.123357	0.0121887	0.6132	51874	102.427
rs2413583	T	C	7.72147e-36	-0.210407	0.0168361	0.1654	51874	156.184
rs140143	T	G	7.94511e-21	-0.126945	0.013562	0.3897	51874	87.6161
rs727563	T	C	1.88274e-10	-0.0921252	0.014461	0.7973	51874	40.5845

## Sheet: Table S3
Table S3 Characteristics of selected SNPs for Ulcerative colitis in European populations
SNP	effect_allele	other_allele	pval	beta	se	eaf	samplesize	F
rs12132349	A	T	3.63664e-31	-0.166942	0.0143783	0.2809	47745	134.808
rs3024493	A	C	1.41971e-43	0.226278	0.0163471	0.1572	47745	191.603
rs111830527	A	G	5.08745e-11	-0.192324	0.0292804	0.05254	47745	43.1433
rs7547569	C	T	8.70964e-65	-0.495701	0.0291648	0.06675	47745	288.883
rs12103	C	T	9.96369e-10	-0.0995588	0.0162944	0.8166	47745	37.3321
rs10910092	G	A	1.42266e-11	-0.0863506	0.0127821	0.4676	47745	45.638
rs35223180	T	G	1.0392e-15	-0.141003	0.0175766	0.1791	47745	64.3557
rs6426833	A	G	3.77051e-76	0.232387	0.0125836	0.536	47745	341.047
rs4656958	G	A	2.8167e-09	0.0824158	0.0138702	0.6821	47745	35.3066
rs1801274	G	A	1.4345e-41	-0.170896	0.012653	0.4958	47745	182.422
rs16841904	T	C	1.90349e-08	0.0860225	0.015305	0.2028	47745	31.5906
rs7608910	G	A	1.25026e-23	0.127099	0.0126851	0.3909	47745	100.391
rs1990760	T	C	1.7809e-10	-0.0855732	0.0134145	0.6085	47745	40.6936
rs13430791	A	G	1.39422e-08	0.105886	0.0186614	0.1202	47745	32.195
rs9941524	G	A	2.15278e-14	0.0977156	0.0127881	0.4559	47745	58.3869
rs10460566	A	G	1.59643e-08	-0.0817673	0.0144699	0.7611	47745	31.9322
rs4973341	T	C	2.25336e-08	0.073473	0.0131405	0.6627	47745	31.2631
rs10185424	G	T	1.47367e-14	-0.0965995	0.0125621	0.5396	47745	59.1324
rs1517352	C	A	2.09991e-09	0.0777839	0.0129859	0.6048	47745	35.8786
rs4676410	A	G	1.85481e-19	0.142022	0.0157426	0.2038	47745	81.3876
rs11676348	T	C	2.07678e-09	0.0744362	0.0124232	0.4763	47745	35.9006
rs9836291	A	G	8.19785e-38	0.170257	0.0132458	0.2878	47745	165.217
rs13136827	C	T	2.34542e-10	-0.111814	0.0176452	0.1622	47745	40.155
rs3774937	C	T	4.60787e-14	0.099276	0.0131621	0.3257	47745	56.8903
rs56167332	A	C	7.2711e-27	0.141368	0.0131737	0.3375	47745	115.156
rs272882	T	G	6.66807e-26	0.145856	0.0138588	0.6733	47745	110.764
rs36070529	A	G	1.04073e-08	-0.091704	0.0160211	0.1999	47745	32.7636
rs4976646	C	T	2.51721e-09	0.0787748	0.0132165	0.3415	47745	35.5256
rs3776414	G	T	4.10346e-08	0.0704798	0.0128464	0.3756	47745	30.1
rs7711427	C	A	3.67367e-12	0.088938	0.0127983	0.613	47745	48.2914
rs7738430	C	T	3.50913e-27	0.367964	0.0340763	0.02624	47745	116.602
rs4947328	G	A	3.38314e-10	0.239455	0.038129	0.02366	47745	39.44
rs9271858	G	A	2.41769e-21	0.122709	0.0129368	0.511	47745	89.9703
rs4712520	C	T	2.20841e-08	0.0929892	0.0166206	0.8182	47745	31.302
rs2516440	A	G	4.40352e-13	-0.0997745	0.0137762	0.3222	47745	52.4542
rs9271255	T	C	1.31009e-94	-0.284959	0.013809	0.732	47745	425.834
rs34659678	T	C	5.95251e-17	0.209947	0.0250948	0.05734	47745	69.9926
rs6920220	A	G	4.77969e-22	0.146936	0.015222	0.2086	47745	93.1779
rs1077773	A	G	5.96458e-09	0.0721282	0.012398	0.5238	47745	33.846
rs12718244	A	G	1.4115e-08	0.0717762	0.0126545	0.4081	47745	32.1715
rs1182188	C	T	5.03153e-15	-0.107615	0.0137507	0.2989	47745	61.2486
rs2395022	C	A	2.87919e-10	-0.183896	0.029166	0.95885	47745	39.7549
rs4728142	A	G	1.91823e-14	0.0969671	0.0126655	0.439	47745	58.6144
rs76546301	A	G	1.04918e-10	0.26496	0.0410174	0.01822	47745	41.7277
rs6466198	T	A	1.8954e-25	0.133923	0.0128457	0.386	47745	108.691
rs13255292	T	C	3.81514e-08	-0.075463	0.0137225	0.3284	47745	30.2414
rs4366152	C	T	7.79471e-19	0.120371	0.0135814	0.68	47745	78.5515
rs10870077	G	C	5.77032e-27	-0.135741	0.0126242	0.5722	47745	115.615
rs10758669	A	C	1.03753e-28	-0.143218	0.0128828	0.6504	47745	123.588
rs4743820	T	C	4.04772e-09	0.0809228	0.0137572	0.7019	47745	34.6004
rs10748783	A	C	7.73393e-39	-0.164756	0.0126394	0.5237	47745	169.914
rs2274351	T	C	4.89531e-08	0.0710979	0.0130334	0.5373	47745	29.7576
rs2497318	T	C	1.14641e-08	-0.0714375	0.0125164	0.4504	47745	32.5757
rs4747886	T	C	9.58341e-09	0.0738479	0.0128701	0.4081	47745	32.924
rs59418206	A	G	1.45001e-08	0.0735513	0.012978	0.3508	47745	32.1192
rs10761659	G	A	1.49796e-20	0.117315	0.0126238	0.5399	47745	86.3628
rs12796489	A	C	1.21787e-33	-0.67649	0.0559623	0.02286	47745	146.127
rs61893460	A	G	4.60363e-22	0.121119	0.0125424	0.4447	47745	93.2531
rs11229555	T	G	1.2147e-08	-0.0823351	0.0144507	0.2515	47745	32.4633
rs11230563	T	C	1.90296e-08	-0.0750666	0.0133556	0.348	47745	31.5912
rs661054	G	A	3.18273e-20	-0.124858	0.0135529	0.3408	47745	84.8728
rs483905	A	G	3.15929e-10	0.0849927	0.0135107	0.289	47745	39.5738
rs12318183	A	C	1.44278e-37	0.162178	0.0126604	0.3854	47745	164.093
rs76904798	T	C	2.77984e-09	0.104624	0.0176013	0.1368	47745	35.3324
rs941823	C	T	1.39155e-13	0.108669	0.0146906	0.7509	47745	54.7183
rs1927681	A	T	1e-200	-0.47866	0.0126594	0.443	47745	1429.64
rs55808324	A	G	1.47092e-09	0.127209	0.021035	0.09318	47745	36.5722
rs7404095	C	T	1.52416e-08	0.0717686	0.0126826	0.5796	47745	32.0223
rs79045992	A	G	1.43321e-08	0.118093	0.02083	0.1033	47745	32.1418
rs11150589	C	T	3.28398e-10	-0.0798521	0.0127057	0.5268	47745	39.498
rs11641184	A	C	4.24043e-10	0.0780232	0.0124939	0.4762	47745	38.9988
rs4795397	G	A	1.00624e-28	0.139853	0.012577	0.4713	47745	123.649
rs9891119	C	A	1.72346e-11	-0.0895467	0.0133101	0.3536	47745	45.2623
rs17780256	C	A	6.12774e-13	-0.115389	0.0160316	0.1927	47745	51.8054
rs7240004	G	A	2.49862e-10	-0.0823655	0.0130179	0.3795	47745	40.0321
rs8096327	G	A	2.24233e-13	0.093806	0.0127914	0.3839	47745	53.7805
rs17694108	A	G	6.16737e-12	0.0958444	0.0139396	0.2797	47745	47.2751
rs12720356	C	A	1.67225e-11	0.153279	0.0227683	0.08572	47745	45.3215
rs11083840	G	T	3.41036e-08	0.0691316	0.0125262	0.4025	47745	30.4589
rs6111031	T	C	1.33137e-42	-0.260863	0.0190685	0.1591	47745	187.151
rs6062496	A	G	9.13903e-19	0.113898	0.0128769	0.5694	47745	78.2365
rs913678	C	T	1.22914e-08	-0.0757579	0.013301	0.3293	47745	32.4405
rs4812833	A	G	1.87068e-16	0.103346	0.0125571	0.5188	47745	67.7343
rs1297256	T	C	2.09604e-15	-0.10106	0.0127351	0.4249	47745	62.9729
rs4456788	A	G	7.06968e-16	-0.102758	0.0127344	0.6106	47745	65.114
rs2836883	A	G	1.47333e-53	-0.227134	0.0147424	0.2728	47745	237.371
rs9611131	C	T	3.84326e-15	-0.142696	0.0181548	0.1477	47745	61.779
rs140143	T	G	1.18631e-19	-0.129716	0.0143011	0.3897	47745	82.2713

## Sheet: Table S4
Table S4 Characteristics of selected SNPs for Crohn's disease in East Asian populations
SNP	effect_allele	other_allele	pval	beta	se	eaf	samplesize	F
rs2975785	G	A	4.62999e-08	-0.245064	0.0448444	0.7296	5409	29.8636
rs6856616	C	T	1.75999e-08	0.267545	0.0474982	0.2203	5409	31.7278
rs60689680	T	G	9.62055e-11	0.270963	0.0418665	0.4095	5409	41.8877
rs9368758	A	G	1.43999e-08	0.235293	0.0415098	0.5315	5409	32.1304
rs4713586	G	A	2.07014e-39	0.652552	0.0496956	0.1548	5409	172.423
rs6930777	T	C	2.66993e-13	-0.964956	0.132027	0.0484	5409	53.4182
rs2395449	A	T	2.01002e-10	0.309131	0.0485836	0.7011	5409	40.4861
rs36110421	C	A	1.81001e-09	-0.518022	0.0861304	0.08954	5409	36.1729
rs16894919	T	G	7.46002e-09	-0.329049	0.0569346	0.1882	5409	33.4017
rs79315643	G	A	1.51985e-20	-0.826374	0.0889885	0.09473	5409	86.2354
rs4366152	C	T	2.52e-45	0.642073	0.0454612	0.601	5409	199.474
rs2006996	C	T	1.7402e-34	0.524139	0.0428427	0.4996	5409	149.672
rs224090	C	T	3.02998e-09	-0.247455	0.0417369	0.5199	5409	35.1522
rs10748783	A	C	6.36063e-11	-0.280698	0.0429599	0.5866	5409	42.6926

## Sheet: Table S5
Table S5 Characteristics of selected SNPs for Ulcerative colitis in East Asian populations
SNP	effect_allele	other_allele	pval	beta	se	eaf	samplesize	F
rs10465507	A	C	9.87006e-09	-0.799165	0.139692	0.04973	4853	32.7288
rs13397737	T	G	2.76001e-10	-1.10646	0.175754	0.04359	4853	39.6334
rs2844623	T	C	1.3499e-22	0.509173	0.0523425	0.2176	4853	94.6285
rs13203429	C	G	7.00971e-13	0.346195	0.0483619	0.522	4853	51.243
rs7741807	C	G	7.57007e-24	0.548562	0.054789	0.1811	4853	100.245
rs2647015	G	T	7.08925e-33	0.621166	0.0524282	0.2054	4853	140.374
rs2274200	C	T	1.6e-08	0.293384	0.0520131	0.2522	4853	31.8161
rs79315643	G	A	1.06001e-09	-0.58572	0.0962554	0.09473	4853	37.028
rs10975003	C	T	6.07995e-09	0.323021	0.0556579	0.1889	4853	33.6828
rs2940716	A	G	4.10998e-10	3.11773	0.499615	0.0001345	4853	38.9409

## Sheet: Table S6
Table S6 Effects of Crohn's disease on extraintestinal cancer risk in European populations
Outcome	Used SNPs	Method	OR	95% CI (lower)	95% CI (upper)	P	P-heterogeneity	P-pleiotropy	After removal of outlier SNPs
									MR-PRESSO Outliers	OR	95% CI (lower)	95% CI (upper)	P	P-heterogeneity	P-pleiotropy
Gastric cancer	117	IVW	1.06361	0.97059	1.16553	0.186607	0.592	0.579	/	/	/	/	/	/	/
		weighted median	1.11317	0.961027	1.28941	0.152759				/	/	/	/
		MR-Egger	0.997425	0.781235	1.27344	0.983531				/	/	/	/
Esophageal cancer	118	IVW	1.01527	0.961615	1.07192	0.584353	0.268	0.535	/	/	/	/	/	/	/
		weighted median	1.07262	0.98487	1.16819	0.10742				/	/	/	/
		MR-Egger	1.06038	0.915037	1.22881	0.437279				/	/	/	/
Bile duct cancer	114	IVW	1	0.999883	1.00012	0.983441	0.265171	0.504021	/	/	/	/	/	/	/
		weighted median	1.00006	0.999866	1.00025	0.551307				/	/	/	/
		MR-Egger	1.0001	0.999779	1.00043	0.528846				/	/	/	/
Hepatocellular carcinoma	111	IVW	0.999969	0.999889	1.00005	0.455926	0.401092	0.39708	/	/	/	/	/	/	/
		weighted median	1.00003	0.999904	1.00016	0.634856				/	/	/	/
		MR-Egger	1.00006	0.999837	1.00028	0.604369				/	/	/	/
Pancreatic cancer	80	IVW	1.10419	1.00867	1.20876	0.0318	0.37	0.067	/	/	/	/	/	/	/
		weighted median	1.11999	0.972382	1.29001	0.116044				/	/	/	/
		MR-Egger	1.34538	1.07221	1.68815	0.0123291				/	/	/	/
Lung cancer	111	IVW	1.01618	0.976643	1.05731	0.428	1.11439e-07	0.911996	rs17391694, rs2974935, rs3184504	1.01713	0.983138	1.05229	0.327417	0.009	0.824
		weighted median	1.00346	0.954893	1.05449	0.891506				1.0048	0.956764	1.05526	0.847935
		MR-Egger	1.02189	0.918216	1.13728	0.692294				1.02714	0.936382	1.1267	0.571628
Cervical cancer	118	IVW	1.0307	0.971439	1.09358	0.31688	0.358	0.711	/	/	/	/	/	/	/
		weighted median	1.02045	0.925214	1.12549	0.685485				/	/	/	/
		MR-Egger	1.06024	0.903044	1.2448	0.476393				/	/	/	/
Breast cancer	112	IVW	1.0168	0.999419	1.03449	0.0582349	4.01586e-22	0.589291	rs11691685, rs17622378, rs2641348, rs2974935,	1.02082	1.00789	1.03391	0.00153187	0.00500262	0.658562
		weighted median	1.01683	0.998844	1.03513	0.0668149			rs3197999, rs36016881, rs56163845, rs6738490,	1.02241	1.0047	1.04043	0.0129196
		MR-Egger	1.00461	0.958531	1.05291	0.847969			rs6908425, rs9889296	1.02825	0.993337	1.0644	0.117109
Skin cancer	116	IVW	1.02447	1.0008	1.04869	0.0426595	1.52932e-14	0.772507	rs1363907, rs2024092, rs516246,	1.02672	1.00625	1.04762	0.0102956	1.30447e-05	0.269644
		weighted median	1.02357	0.996773	1.05109	0.085206			rs6679677, rs9457247	1.02362	0.9971	1.05084	0.0813125
		MR-Egger	1.0158	0.954641	1.08087	0.621757				0.999011	0.948049	1.05271	0.970524
IVW, inverse variance weighted; OR, odds ratio; CI, confidence interval.

## Sheet: Table S7
Table S7 Effects of ulcerative colitis on extraintestinal cancer risk in European populations
Outcome	Used SNPs	Method	OR	95% CI (lower)	95% CI (upper)	P	P-heterogeneity	P-pleiotropy	After removal of outlier SNPs
									MR-PRESSO Outliers	OR	95% CI (lower)	95% CI (upper)	P	P-heterogeneity	P-pleiotropy
Gastric cancer	84	IVW	1.0283	0.912783	1.15843	0.646255	0.206963	0.408551	/	/	/	/	/	/	/
		weighted median	1.00988	0.851658	1.19751	0.909924				/	/	/	/
		MR-Egger	1.15065	0.860229	1.53912	0.347162				/	/	/	/
Esophageal cancer	85	IVW	0.971981	0.911597	1.03636	0.385139	0.389946	0.172297	/	/	/	/	/	/	/
		weighted median	0.920301	0.833566	1.01606	0.100072				/	/	/	/
		MR-Egger	0.883218	0.759795	1.02669	0.109671				/	/	/	/
Bile duct cancer	79	IVW	0.999991	0.999839	1.00014	0.913136	0.138	0.806	/	/	/	/	/	/	/
		weighted median	0.999982	0.999756	1.00021	0.878018				/	/	/	/
		MR-Egger	1.00003	0.999657	1.00041	0.856442				/	/	/	/
Hepatocellular carcinoma	75	IVW	0.999971	0.999863	1.00008	0.592758	0.449686	0.604642	/	/	/	/	/	/	/
		weighted median	0.999964	0.999804	1.00012	0.66173				/	/	/	/
		MR-Egger	1.00013	0.999835	1.00042	0.3952				/	/	/	/
Pancreatic cancer	51	IVW	0.94612	0.829547	1.07907	0.409031	0.306	0.978	/	/	/	/	/	/	/
		weighted median	0.91017	0.745796	1.11077	0.354336				/	/	/	/
		MR-Egger	0.950886	0.647166	1.39714	0.798621				/	/	/	/
Lung cancer	85	IVW	0.989634	0.953236	1.02742	0.58572	0.0898723	0.626906	/	/	/	/	/	/	/
		weighted median	0.997478	0.945585	1.05222	0.9262				/	/	/	/
		MR-Egger	1.00971	0.923707	1.10372	0.832077				/	/	/	/
Cervical cancer	85	IVW	1.09205	1.00906	1.18188	0.0289961	0.0464197	0.324762	rs9271858	1.10911	1.02857	1.19596	0.00709478	0.179437	0.348188
		weighted median	1.11029	0.993661	1.24061	0.0646483				1.11202	0.991157	1.24763	0.070497
		MR-Egger	1.18984	0.98671	1.43479	0.0723764				1.1982	1.00348	1.43069	0.0489825
Breast cancer	83	IVW	1.01406	0.993587	1.03495	0.179679	2.66179e-14	0.380139	rs10460566, rs35223180, rs4712520,	1.02202	1.00505	1.03928	0.0107823	0.000126036	0.746363
		weighted median	1.01176	0.990487	1.03348	0.280952			rs913678, rs9836291	1.0121	0.991912	1.0327	0.241984
		MR-Egger	1.03454	0.98519	1.08636	0.177091				1.02816	0.987971	1.06998	0.176245
Skin cancer	83	IVW	1.01869	0.99421	1.04377	0.135663	0.00050388	0.549817	/	/	/	/	/	/	/
		weighted median	1.00568	0.974515	1.03784	0.724333				/	/	/	/
		MR-Egger	1.00187	0.94392	1.06337	0.951194				/	/	/	/
IVW, inverse variance weighted; OR, odds ratio; CI, confidence interval.

## Sheet: Table S8
Table S8 Effects of Crohn's disease on extraintestinal cancer risk in East Asian populations
Outcome	Used SNPs	Method	OR	95% CI (lower)	95% CI (upper)	P	P-heterogeneity	P-pleiotropy	After removal of outlier SNPs
									MR-PRESSO Outliers	OR	95% CI (lower)	95% CI (upper)	P	P-heterogeneity	P-pleiotropy
Gastric cancer	14	IVW	1.02723	0.99212	1.06359	0.129978	0.058	0.87	/	/	/	/	/	/	/
		weighted median	1.01449	0.975696	1.05482	0.469644				/	/	/	/
		MR-Egger	1.02041	0.936024	1.1124	0.654592				/	/	/	/
Esophageal cancer	14	IVW	1.01109	0.953394	1.07228	0.712876	0.476	0.477	/	/	/	/	/	/	/
		weighted median	1.0109	0.930933	1.09774	0.796483				/	/	/	/
		MR-Egger	0.963846	0.837286	1.10954	0.617451				/	/	/	/
Bile duct cancer	14	IVW	0.938969	0.816275	1.0801	0.378084	0.115	0.156	/	/	/	/	/	/	/
		weighted median	1.01198	0.858696	1.19262	0.887028				/	/	/	/
		MR-Egger	1.17407	0.853525	1.61499	0.343393				/	/	/	/
Hepatocellular carcinoma	14	IVW	1.03938	0.950939	1.13605	0.394595	6.036e-05	0.285	rs16894919, rs36110421, rs6930777	1.04992	0.99328	1.1098	0.0851198	0.856644	0.729757
		weighted median	1.05682	0.983742	1.13532	0.130635				1.05494	0.98067	1.13483	0.151021
		MR-Egger	1.15921	0.939273	1.43066	0.193849				1.07458	0.934953	1.23506	0.337565
Pancreatic cancer	14	IVW	1.18764	1.07408	1.3132	0.000797221	0.781112	0.182021	/	/	/	/	/	/	/
		weighted median	1.17842	1.02914	1.34935	0.0175167				/	/	/	/
		MR-Egger	1.39019	1.09364	1.76716	0.0196269				/	/	/	/
Lung cancer	14	IVW	0.999774	0.952681	1.04919	0.992674	0.014	0.129	/	/	/	/	/	/	/
		weighted median	0.976762	0.928092	1.02798	0.36725				/	/	/	/
		MR-Egger	1.08525	0.973614	1.20968	0.165386				/	/	/	/
Cervical cancer	14	IVW	0.915844	0.820846	1.02184	0.115627	0.08	0.559	/	/	/	/	/	/	/
		weighted median	0.887214	0.781574	1.00713	0.0642985				/	/	/	/
		MR-Egger	0.987052	0.754365	1.29151	0.925875				/	/	/	/
Breast cancer	14	IVW	0.935287	0.892978	0.979601	0.00461688	0.00282297	0.623811	rs16894919	0.945215	0.909621	0.982202	0.00401468	0.0827114	0.871131
		weighted median	0.95491	0.91298	0.998767	0.0440254				0.961902	0.920313	1.00537	0.0849826
		MR-Egger	0.960524	0.856942	1.07663	0.502223				0.95207	0.866457	1.04614	0.328877
Skin cancer	14	IVW	1.11808	0.919614	1.35937	0.262939	0.197	0.945	/	/	/	/	/	/	/
		weighted median	1.15424	0.905488	1.47132	0.246746				/	/	/	/
		MR-Egger	1.10044	0.676973	1.7888	0.706165				/	/	/	/
IVW, inverse variance weighted; OR, odds ratio; CI, confidence interval.

## Sheet: Table S9
Table S9 Effects of ulcerative colitis on extraintestinal cancer risk in East Asian populations
Outcome	Used SNPs	Method	OR	95% CI (lower)	95% CI (upper)	P	P-heterogeneity	P-pleiotropy	After removal of outlier SNPs
									MR-PRESSO Outliers	OR	95% CI (lower)	95% CI (upper)	P	P-heterogeneity	P-pleiotropy
Gastric cancer	7	IVW	1.12397	1.06243	1.18906	4.7359e-05	0.079	0.058	/	/	/	/	/	/	/
		weighted median	1.14261	1.08282	1.20571	1.16534e-06				/	/	/	/
		MR-Egger	1.34903	1.15931	1.5698	0.01174				/	/	/	/
Esophageal cancer	7	IVW	1.00734	0.920805	1.10201	0.873151	0.693	0.284	/	/	/	/	/	/	/
		weighted median	1.03208	0.928378	1.14737	0.558886				/	/	/	/
		MR-Egger	1.22156	0.880167	1.69537	0.285057				/	/	/	/
Bile duct cancer	7	IVW	1.31069	1.09834	1.5641	0.00269862	0.8	0.36	/	/	/	/	/	/	/
		weighted median	1.3118	1.06227	1.61995	0.0116958				/	/	/	/
		MR-Egger	1.80071	0.94701	3.42401	0.132789				/	/	/	/
Hepatocellular carcinoma	7	IVW	1.23647	1.12354	1.36075	1.4007e-05	0.139	0.293	/	/	/	/	/	/	/
		weighted median	1.23875	1.10455	1.38927	0.000252555				/	/	/	/
		MR-Egger	1.50302	1.07143	2.10847	0.064788				/	/	/	/
Pancreatic cancer	7	IVW	0.983622	0.833728	1.16047	0.844795	0.331747	0.660187	/	/	/	/	/	/	/
		weighted median	0.923763	0.762859	1.11861	0.416717				/	/	/	/
		MR-Egger	0.848727	0.44572	1.61612	0.638858				/	/	/	/
Lung cancer	7	IVW	1.16891	1.05223	1.29854	0.0036286	0.0003	0.564	rs2647015, rs79315643	1.13126	1.028	1.2449	0.0115562	0.054	0.819
		weighted median	1.19349	1.10402	1.29022	8.63311e-06				1.10741	1.01078	1.21328	0.0285127
		MR-Egger	1.32154	0.881576	1.98106	0.234979				1.19019	0.786824	1.80035	0.470059
Cervical cancer	7	IVW	1.39405	1.1708	1.65988	0.000190846	0.115	0.871	/	/	/	/	/	/	/
		weighted median	1.53863	1.27634	1.85482	6.21861e-06				/	/	/	/
		MR-Egger	1.47747	0.738852	2.95448	0.319874				/	/	/	/
Breast cancer	7	IVW	1.094	1.02006	1.1733	0.0118576	0.026931	0.165655	rs7741807	1.04996	0.996432	1.10636	0.0678334	0.458377	0.17895
		weighted median	1.07975	1.01501	1.14862	0.0150017				1.06036	0.99189	1.13356	0.0852684
		MR-Egger	1.30988	1.04466	1.64244	0.0665072				1.20701	1.01239	1.43904	0.103978
Skin cancer	8	IVW	1.17614	0.883408	1.56587	0.266553	0.293	0.098	/	/	/	/	/	/	/
		weighted median	1.23684	0.882395	1.73367	0.217283				/	/	/	/
		MR-Egger	0.472929	0.183181	1.22099	0.17273				/	/	/	/
IVW, inverse variance weighted; OR, odds ratio; CI, confidence interval.
